# Supplementary material
Source: Springer Nature journal article supplement (https://www.springermedizin.de/resource/supplementary/12885_2011_2977_MOESM4_ESM.pdf/9462430)
Supplement: MOESM4 [file 9462430]

**A**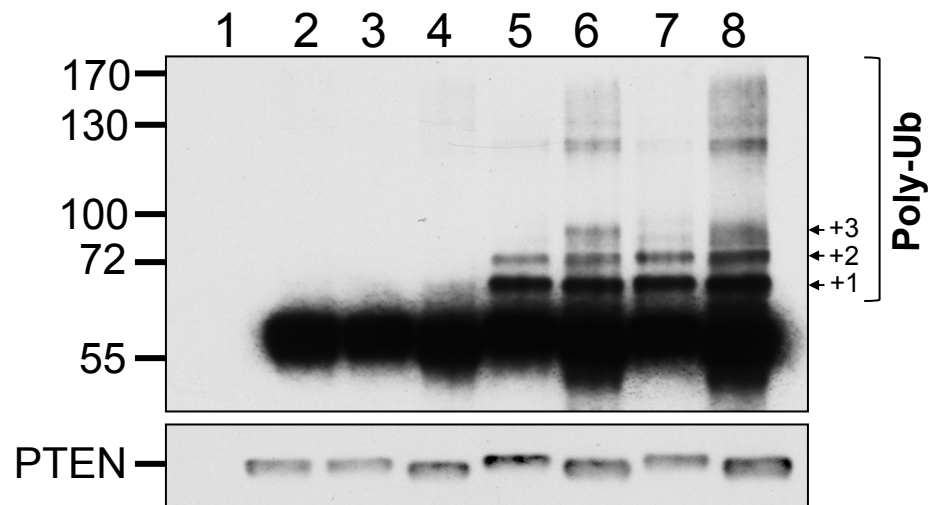

|                      |    |    |    |    |    |    |    |    |
|----------------------|----|----|----|----|----|----|----|----|
| E1                   | +  | -  | +  | +  | +  | +  | +  | +  |
| E2                   | +  | +  | +  | +  | +  | +  | +  | +  |
| NEDD4 (1:10)         | +  | +  | -  | -  | +  | +  | +  | +  |
| PTEN-WT (180ng)      | -  | +  | +  | -  | +  | -  | +  | -  |
| PTEN-E307K (170ng)   | -  | -  | -  | +  | -  | +  | -  | +  |
| Reaction time (mins) | 60 | 60 | 60 | 60 | 30 | 30 | 60 | 60 |
| Ub-WT                | +  | +  | +  | +  | +  | +  | +  | +  |

**B**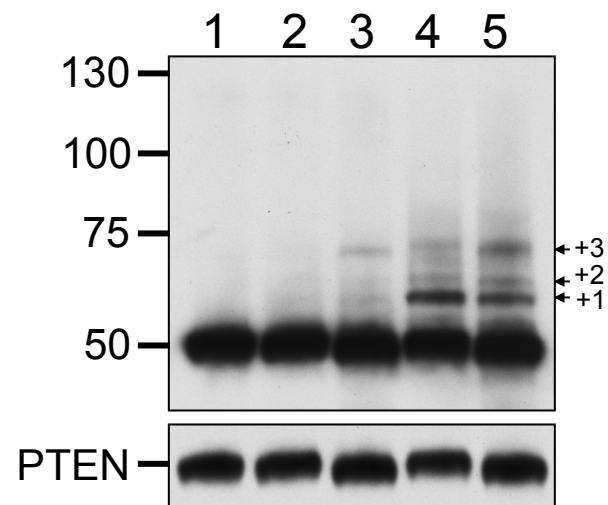

|                      |    |    |    |    |    |
|----------------------|----|----|----|----|----|
| E1                   | -  | +  | +  | +  | +  |
| E2                   | +  | +  | +  | +  | +  |
| NEDD4 (1:10)         | +  | -  | -  | +  | +  |
| PTEN-WT (180ng)      | +  | +  | -  | +  | -  |
| PTEN-E307K (170ng)   | -  | -  | +  | -  | +  |
| Reaction time (mins) | 60 | 60 | 60 | 60 | 60 |
| Ub-KO                | +  | +  | +  | +  | +  |
